# Supplementary material for: Facile synthesis of highly stable and well-dispersed mesoporous ZrO2/carbon composites with high performance in oxidative dehydrogenation of ethylbenzene
Source: Royal Society of Chemistry journal article supplement (doi:10.1039/c004469e), 2010-01-01
Supplement: c004469e.pdf [file c004469e.pdf]

## **Supporting information**

### **Facile Synthesis of Highly Stable and Well-Dispersed Mesoporous ZrO<sub>2</sub>/FDU-15 Composites with High Performance in Oxidative Dehydrogenation of Ethylbenzene**

**Qiang Li, Jie Xu, Zhangxiong Wu, Dan Feng, Jianping Yang, Jing Wei, Qingling Wu, Bo Tu, Yong Cao and Dongyuan Zhao\***

*Department of Chemistry and Shanghai Key Laboratory of Molecular Catalysis and Innovative Materials, Laboratory of Advanced Materials, Fudan University, Shanghai 200433, People's Republic of China*

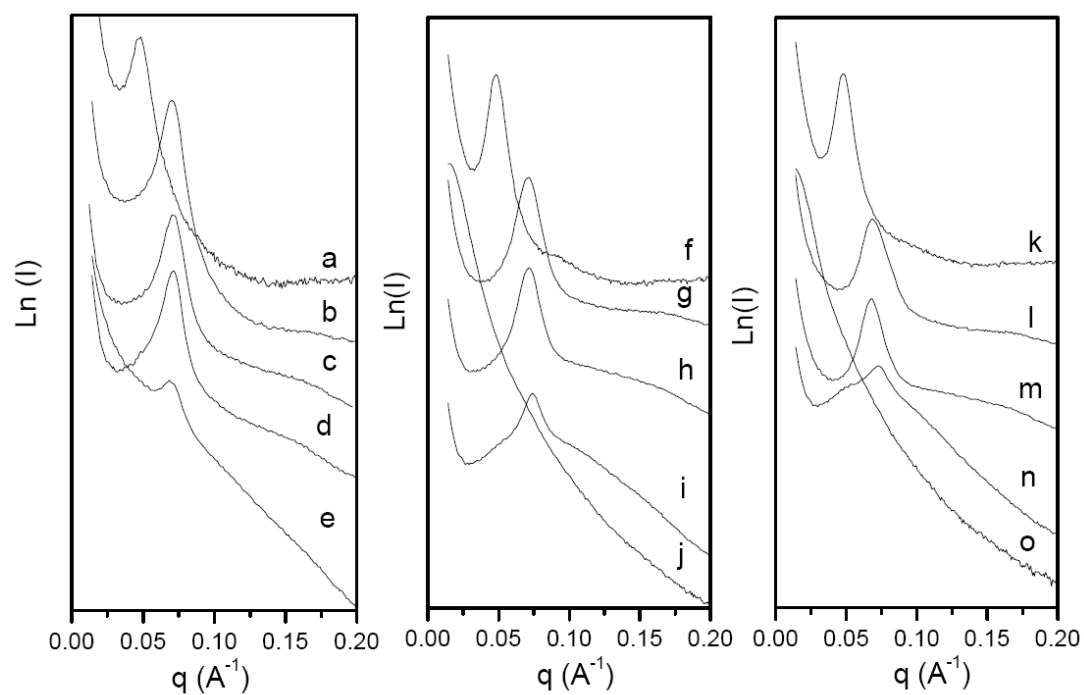

**Fig. S1** SAXS patterns of mesoporous zirconia/FDU-15 composites with different zirconium contents and pyrolysis temperatures: (a) ZC-II-as-made; (b) ZC-II-600; (c) ZC-II-700; (d) ZC-II-800; (e) ZC-II-900; (f) ZC-III-as-made; (g) ZC-III-600; and (h) ZC-III-700; (i) ZC-III-800; (j) ZC-III-900; (k) ZC-IV-as-made; (l) ZC-IV-600; (m) ZC-IV-700; (n) ZC-IV-800; (o) ZC-IV-900.

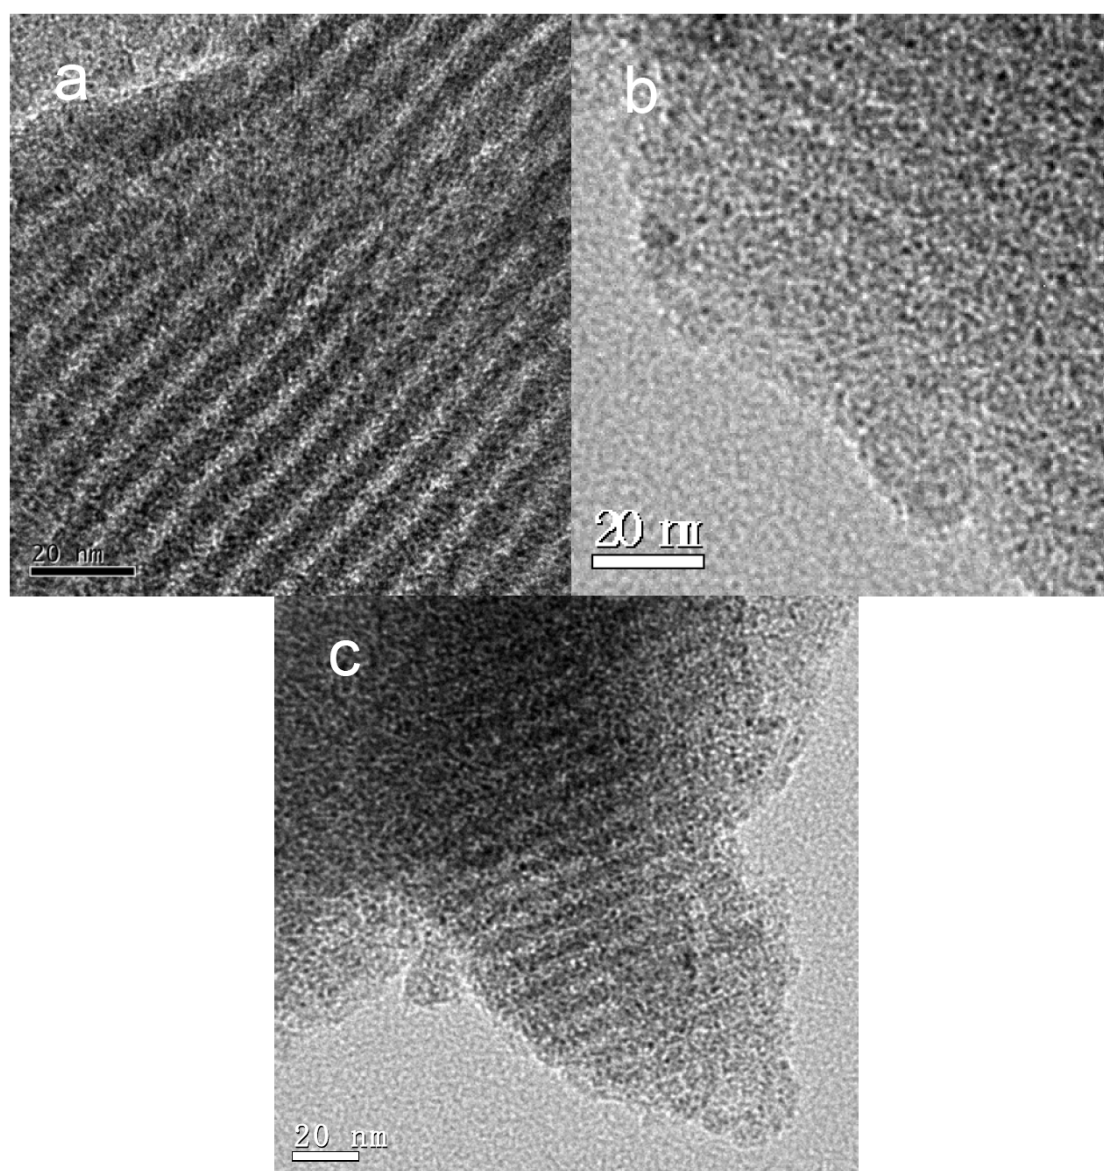

**Fig. S2** TEM images of mesoporous  $\text{ZrO}_2/\text{FDU-15}$  composites: (a) ZC-II -600; (b) ZC-III -600; (c) ZC-IV-600.

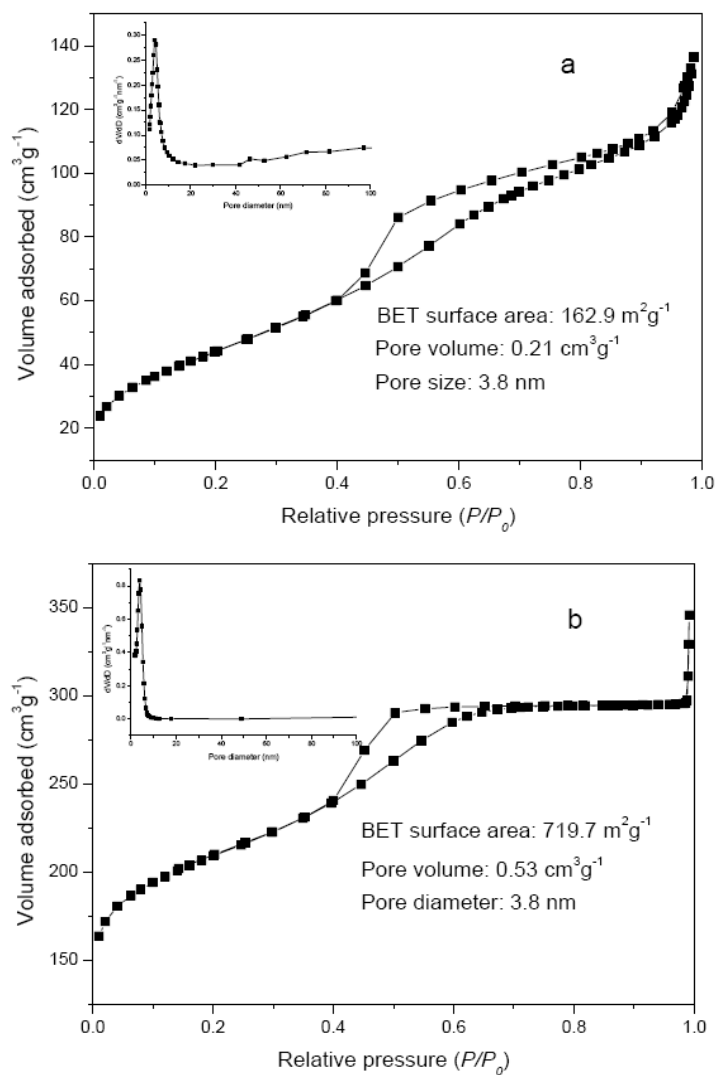

**Fig. S3** Nitrogen sorption isotherms and corresponding pore size distributions of (a) mesoporous zirconia (Meso-ZrO<sub>2</sub>) and (b) pristine mesoporous carbon FDU-15.

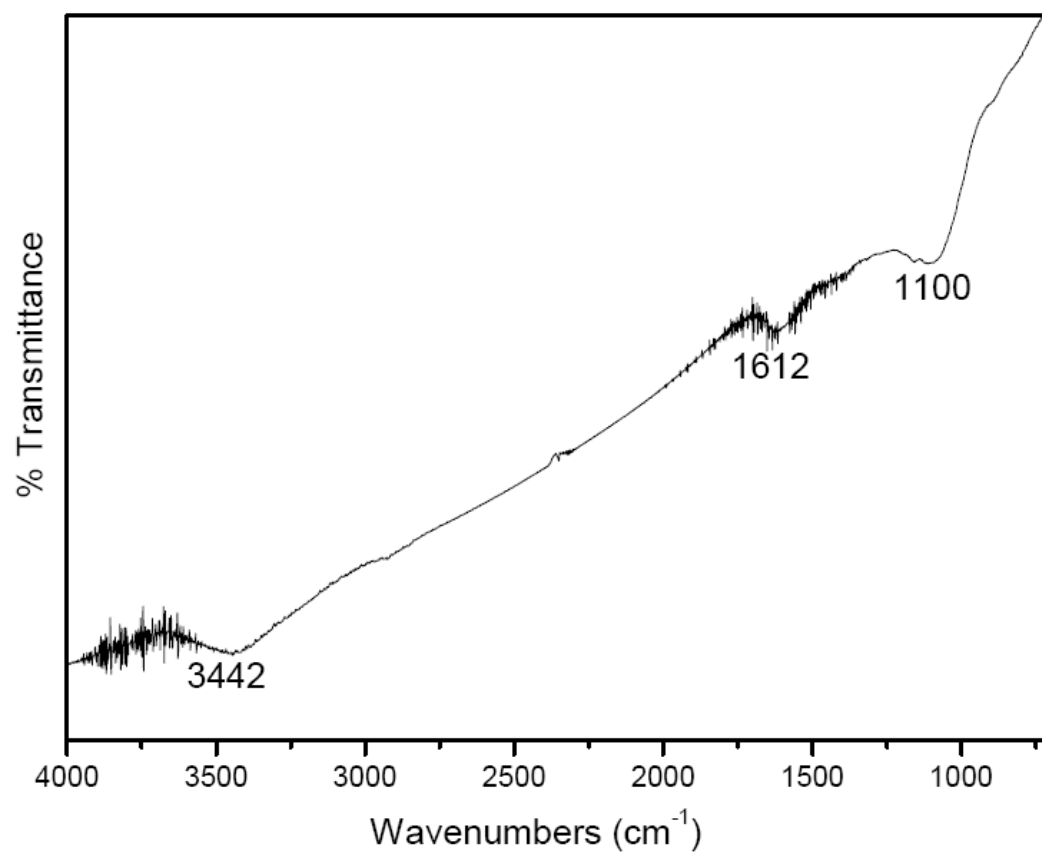

Fig. S4 FT-IR spectrum of pristine mesoporous carbon FDU-15.

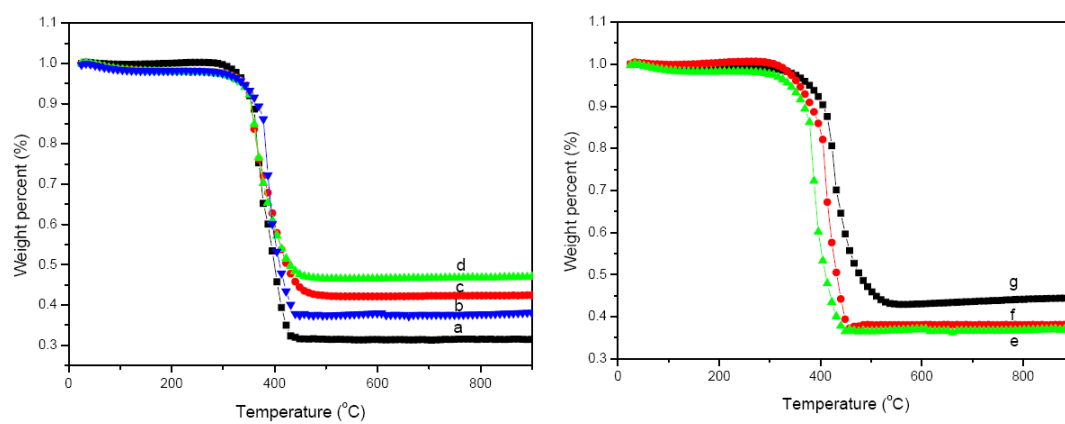

Fig. S5 TG curves of mesoporous  $\text{ZrO}_2/\text{FDU-15}$  composites under air atmosphere. (a) ZC-I-600; (b) ZC-II-600; (c) ZC-III-600; (d) ZC-IV-600; (e) ZC-I-700; (f) ZC-I-800; and (g) ZC-I-900.
